# Supplementary material for: Associations between loneliness and perceived social support and outcomes of mental health problems: a systematic review
Source: Springer Nature journal article supplement (doi:10.1186/s12888-018-1736-5), 2018-05-29
Supplement: MOESM1 [file 15800584]

## Additional file 1: Search strategies

### Medline

| Default search limits = title and abstract (except where otherwise stated) |                                                                                                              |                                              |
|----------------------------------------------------------------------------|--------------------------------------------------------------------------------------------------------------|----------------------------------------------|
| #                                                                          | Search term                                                                                                  | Description                                  |
| 1                                                                          | loneliness [MeSH]                                                                                            |                                              |
| 2                                                                          | loneliness                                                                                                   |                                              |
| 3                                                                          | lonely                                                                                                       |                                              |
| 4                                                                          | (social support adj5 (subjective or personal or perceived or quality))                                       |                                              |
| 5                                                                          | “confiding relationship*”                                                                                    |                                              |
| 6                                                                          | #1 OR #2 OR #3 OR #4 OR #5                                                                                   | Loneliness and related terms                 |
| 7                                                                          | mental disorders [MeSH]. exp                                                                                 |                                              |
| 8                                                                          | mental                                                                                                       |                                              |
| 9                                                                          | psychiatr*                                                                                                   |                                              |
| 10                                                                         | schizo*                                                                                                      |                                              |
| 11                                                                         | psychosis                                                                                                    |                                              |
| 12                                                                         | psychotic                                                                                                    |                                              |
| 13                                                                         | depress*                                                                                                     |                                              |
| 14                                                                         | mania*                                                                                                       |                                              |
| 15                                                                         | manic                                                                                                        |                                              |
| 16                                                                         | (bipolar adj5 (disorder or disease or illness))                                                              |                                              |
| 17                                                                         | anxiety disorders [MeSH]. exp                                                                                |                                              |
| 18                                                                         | #7 OR #8 OR #9 OR #10 OR #11 OR #12 OR #13 OR #14 OR #15 OR #16 OR #17                                       | Mental disorders                             |
| 19                                                                         | #6 AND #18                                                                                                   | Loneliness, mental disorders                 |
| 20                                                                         | prognosis [MeSH]                                                                                             |                                              |
| 21                                                                         | outcome*                                                                                                     |                                              |
| 22                                                                         | recurren*                                                                                                    |                                              |
| 23                                                                         | relapse                                                                                                      |                                              |
| 24                                                                         | admission                                                                                                    |                                              |
| 25                                                                         | hospitali?ation                                                                                              |                                              |
| 26                                                                         | crisis                                                                                                       |                                              |
| 27                                                                         | admitted                                                                                                     |                                              |
| 28                                                                         | detained                                                                                                     |                                              |
| 29                                                                         | detention                                                                                                    |                                              |
| 30                                                                         | recovery of function [MeSH]                                                                                  |                                              |
| 31                                                                         | “social functioning”                                                                                         |                                              |
| 32                                                                         | “self-rated recovery”                                                                                        |                                              |
| 33                                                                         | “quality of life”                                                                                            |                                              |
| 34                                                                         | “symptom severity”                                                                                           |                                              |
| 35                                                                         | disability                                                                                                   |                                              |
| 36                                                                         | #20 OR #21 OR #22 OR #23 OR #24 OR #25 OR #26 OR #27 OR #28 OR #29 OR #30 OR #31 OR #32 OR #33 OR #34 OR #35 | Outcomes                                     |
| 37                                                                         | onset                                                                                                        |                                              |
| 38                                                                         | first-episode                                                                                                |                                              |
| 39                                                                         | incidence [MeSH]                                                                                             |                                              |
| 40                                                                         | rate                                                                                                         |                                              |
| 41                                                                         | #37 OR #38 OR #39 OR #40                                                                                     | Onset                                        |
| 42                                                                         | #36 OR #41                                                                                                   | Outcomes/onset                               |
| 43                                                                         | #19 AND #42                                                                                                  | Loneliness, mental disorders, outcomes/onset |

## PsycINFO

| Default search limits = title and abstract (except where otherwise stated) |                                                                                                              |                                              |
|----------------------------------------------------------------------------|--------------------------------------------------------------------------------------------------------------|----------------------------------------------|
| #                                                                          | Search term                                                                                                  | Description                                  |
| 1                                                                          | loneliness [Subject Headings]                                                                                |                                              |
| 2                                                                          | loneliness                                                                                                   |                                              |
| 3                                                                          | lonely                                                                                                       |                                              |
| 4                                                                          | (social support adj5 (subjective or personal or perceived or quality))                                       |                                              |
| 5                                                                          | “confiding relationship*”                                                                                    |                                              |
| 6                                                                          | #1 OR #2 OR #3 OR #4 OR #5                                                                                   | Loneliness and related terms                 |
| 7                                                                          | mental disorders [Subject Headings]. exp                                                                     |                                              |
| 8                                                                          | mental                                                                                                       |                                              |
| 9                                                                          | psychiatr*                                                                                                   |                                              |
| 10                                                                         | schizo*                                                                                                      |                                              |
| 11                                                                         | psychosis                                                                                                    |                                              |
| 12                                                                         | psychotic                                                                                                    |                                              |
| 13                                                                         | depress*                                                                                                     |                                              |
| 14                                                                         | mania*                                                                                                       |                                              |
| 15                                                                         | manic                                                                                                        |                                              |
| 16                                                                         | (bipolar adj5 (disorder or disease or illness))                                                              |                                              |
| 17                                                                         | anxiety disorders [Subject Headings]. exp                                                                    |                                              |
| 18                                                                         | #7 OR #8 OR #9 OR #10 OR #11 OR #12 OR #13 OR #14 OR #15 OR #16 OR #17                                       | Mental disorders                             |
| 19                                                                         | #6 AND #18                                                                                                   | Loneliness, mental disorders                 |
| 20                                                                         | prognosis [Subject Headings]                                                                                 |                                              |
| 21                                                                         | outcome*                                                                                                     |                                              |
| 22                                                                         | recurren*                                                                                                    |                                              |
| 23                                                                         | relapse                                                                                                      |                                              |
| 24                                                                         | admission                                                                                                    |                                              |
| 25                                                                         | hospitali?ation                                                                                              |                                              |
| 26                                                                         | crisis                                                                                                       |                                              |
| 27                                                                         | admitted                                                                                                     |                                              |
| 28                                                                         | detained                                                                                                     |                                              |
| 29                                                                         | detention                                                                                                    |                                              |
| 30                                                                         | recovery (Disorders) [Subject Headings]                                                                      |                                              |
| 31                                                                         | “social functioning”                                                                                         |                                              |
| 32                                                                         | “self-rated recovery”                                                                                        |                                              |
| 33                                                                         | “quality of life”                                                                                            |                                              |
| 34                                                                         | “symptom severity”                                                                                           |                                              |
| 35                                                                         | disability                                                                                                   |                                              |
| 36                                                                         | #20 OR #21 OR #22 OR #23 OR #24 OR #25 OR #26 OR #27 OR #28 OR #29 OR #30 OR #31 OR #32 OR #33 OR #34 OR #35 | Outcomes                                     |
| 37                                                                         | onset                                                                                                        |                                              |
| 38                                                                         | first-episode                                                                                                |                                              |
| 39                                                                         | incidence                                                                                                    |                                              |
| 40                                                                         | rate                                                                                                         |                                              |
| 41                                                                         | #37 OR #38 OR #39 OR #40                                                                                     | Onset                                        |
| 42                                                                         | #36 OR #41                                                                                                   | Outcomes/onset                               |
| 43                                                                         | #19 AND #42                                                                                                  | Loneliness, mental disorders, outcomes/onset |

## Embase

| Default search limits = title and abstract (except where otherwise stated) |                                                                                                              |                                              |
|----------------------------------------------------------------------------|--------------------------------------------------------------------------------------------------------------|----------------------------------------------|
| #                                                                          | Search term                                                                                                  | Description                                  |
| 1                                                                          | loneliness [Subject Headings]                                                                                |                                              |
| 2                                                                          | loneliness                                                                                                   |                                              |
| 3                                                                          | lonely                                                                                                       |                                              |
| 4                                                                          | (social support adj5 (subjective or personal or perceived or quality))                                       |                                              |
| 5                                                                          | “confiding relationship*”                                                                                    |                                              |
| 6                                                                          | #1 OR #2 OR #3 OR #4 OR #5                                                                                   | Loneliness and related terms                 |
| 7                                                                          | mental disease [Subject Headings]. exp                                                                       |                                              |
| 8                                                                          | mental                                                                                                       |                                              |
| 9                                                                          | psychiatr*                                                                                                   |                                              |
| 10                                                                         | schizo*                                                                                                      |                                              |
| 11                                                                         | psychosis                                                                                                    |                                              |
| 12                                                                         | psychotic                                                                                                    |                                              |
| 13                                                                         | depress*                                                                                                     |                                              |
| 14                                                                         | mania*                                                                                                       |                                              |
| 15                                                                         | manic                                                                                                        |                                              |
| 16                                                                         | (bipolar adj5 (disorder or disease or illness))                                                              |                                              |
| 17                                                                         | anxiety disorder [Subject Headings]. exp                                                                     |                                              |
| 18                                                                         | #7 OR #8 OR #9 OR #10 OR #11 OR #12 OR #13 OR #14 OR #15 OR #16 OR #17                                       | Mental disorders                             |
| 19                                                                         | #6 AND #18                                                                                                   | Loneliness, mental disorders                 |
| 20                                                                         | prognosis [Subject Headings]                                                                                 |                                              |
| 21                                                                         | outcome*                                                                                                     |                                              |
| 22                                                                         | recurren*                                                                                                    |                                              |
| 23                                                                         | relapse                                                                                                      |                                              |
| 24                                                                         | admission                                                                                                    |                                              |
| 25                                                                         | hospitali?ation                                                                                              |                                              |
| 26                                                                         | crisis                                                                                                       |                                              |
| 27                                                                         | admitted                                                                                                     |                                              |
| 28                                                                         | detained                                                                                                     |                                              |
| 29                                                                         | detention                                                                                                    |                                              |
| 30                                                                         | convalescence [Subject Headings]                                                                             |                                              |
| 31                                                                         | “social functioning”                                                                                         |                                              |
| 32                                                                         | “self-rated recovery”                                                                                        |                                              |
| 33                                                                         | “quality of life”                                                                                            |                                              |
| 34                                                                         | “symptom severity”                                                                                           |                                              |
| 35                                                                         | disability                                                                                                   |                                              |
| 36                                                                         | #20 OR #21 OR #22 OR #23 OR #24 OR #25 OR #26 OR #27 OR #28 OR #29 OR #30 OR #31 OR #32 OR #33 OR #34 OR #35 | Outcomes                                     |
| 37                                                                         | onset                                                                                                        |                                              |
| 38                                                                         | first-episode                                                                                                |                                              |
| 39                                                                         | incidence [Subject Headings]                                                                                 |                                              |
| 40                                                                         | rate                                                                                                         |                                              |
| 41                                                                         | #37 OR #38 OR #39 OR #40                                                                                     | Onset                                        |
| 42                                                                         | #36 OR #41                                                                                                   | Outcomes/onset                               |
| 43                                                                         | #19 AND #42                                                                                                  | Loneliness, mental disorders, outcomes/onset |

## Web of Science

| Default search limits = topic (except where otherwise stated) |                                                                                                       |                                              |
|---------------------------------------------------------------|-------------------------------------------------------------------------------------------------------|----------------------------------------------|
| #                                                             | Search term                                                                                           | Description                                  |
| 1                                                             | loneliness                                                                                            |                                              |
| 2                                                             | lonely                                                                                                |                                              |
| 3                                                             | “social support” near/5 (subjective or personal or perceived or quality)                              |                                              |
| 4                                                             | “confiding relationship*”                                                                             |                                              |
| 5                                                             | #1 OR #2 OR #3 OR #4                                                                                  | Loneliness and related terms                 |
| 6                                                             | mental                                                                                                |                                              |
| 7                                                             | psychiatr*                                                                                            |                                              |
| 8                                                             | schizo*                                                                                               |                                              |
| 9                                                             | psychosis                                                                                             |                                              |
| 10                                                            | psychotic                                                                                             |                                              |
| 11                                                            | depress*                                                                                              |                                              |
| 12                                                            | mania*                                                                                                |                                              |
| 13                                                            | manic                                                                                                 |                                              |
| 14                                                            | bipolar near/5 (disorder or disease or illness)                                                       |                                              |
| 15                                                            | anxiety                                                                                               |                                              |
| 16                                                            | #6 OR #7 OR #8 OR #9 OR #10 OR #11 OR #12 OR #13 OR #14 OR #15                                        | Mental disorders                             |
| 17                                                            | #5 AND #16                                                                                            | Loneliness, mental disorders                 |
| 18                                                            | prognosis                                                                                             |                                              |
| 19                                                            | outcome*                                                                                              |                                              |
| 20                                                            | recurren*                                                                                             |                                              |
| 21                                                            | relapse                                                                                               |                                              |
| 22                                                            | admission                                                                                             |                                              |
| 23                                                            | hospitali?ation                                                                                       |                                              |
| 24                                                            | crisis                                                                                                |                                              |
| 25                                                            | admitted                                                                                              |                                              |
| 26                                                            | detained                                                                                              |                                              |
| 27                                                            | detention                                                                                             |                                              |
| 28                                                            | recovery                                                                                              |                                              |
| 29                                                            | “social functioning”                                                                                  |                                              |
| 30                                                            | “quality of life”                                                                                     |                                              |
| 31                                                            | “symptom severity”                                                                                    |                                              |
| 32                                                            | disability                                                                                            |                                              |
| 33                                                            | #18 OR #19 OR #20 OR #21 OR #22 OR #23 OR #24 OR #25 OR #26 OR #27 OR #28 OR #29 OR #30 OR #31 OR #32 | Outcomes                                     |
| 34                                                            | onset                                                                                                 |                                              |
| 35                                                            | first-episode                                                                                         |                                              |
| 36                                                            | incidence                                                                                             |                                              |
| 37                                                            | rate                                                                                                  |                                              |
| 38                                                            | #34 OR #35 OR #36 OR #37                                                                              | Onset                                        |
| 39                                                            | #33 OR #38                                                                                            | Outcomes/onset                               |
| 40                                                            | #17 AND #39                                                                                           | Loneliness, mental disorders, outcomes/onset |

## Cinahl

| Default search limits = title and abstract (except where otherwise stated) |                                                                                                              |                                              |
|----------------------------------------------------------------------------|--------------------------------------------------------------------------------------------------------------|----------------------------------------------|
| #                                                                          | Search term                                                                                                  | Description                                  |
| 1                                                                          | loneliness [Subject Headings]                                                                                |                                              |
| 2                                                                          | loneliness                                                                                                   |                                              |
| 3                                                                          | lonely                                                                                                       |                                              |
| 4                                                                          | “social support” N5 (subjective or personal or perceived or quality)                                         |                                              |
| 5                                                                          | “confiding relationship*”                                                                                    |                                              |
| 6                                                                          | #1 OR #2 OR #3 OR #4 OR #5                                                                                   | Loneliness and related terms                 |
| 7                                                                          | mental disorders [Subject Headings]. exp                                                                     |                                              |
| 8                                                                          | mental                                                                                                       |                                              |
| 9                                                                          | psychiatr*                                                                                                   |                                              |
| 10                                                                         | schizo*                                                                                                      |                                              |
| 11                                                                         | psychosis                                                                                                    |                                              |
| 12                                                                         | psychotic                                                                                                    |                                              |
| 13                                                                         | depress*                                                                                                     |                                              |
| 14                                                                         | mania*                                                                                                       |                                              |
| 15                                                                         | manic                                                                                                        |                                              |
| 16                                                                         | bipolar N5 (disorder or disease or illness)                                                                  |                                              |
| 17                                                                         | anxiety disorders [Subject Headings]. exp                                                                    |                                              |
| 18                                                                         | #7 OR #8 OR #9 OR #10 OR #11 OR #12 OR #13 OR #14 OR #15 OR #16 OR #17                                       | Mental disorders                             |
| 19                                                                         | #6 AND #18                                                                                                   | Loneliness, mental disorders                 |
| 20                                                                         | prognosis [Subject Headings]                                                                                 |                                              |
| 21                                                                         | outcome*                                                                                                     |                                              |
| 22                                                                         | recurren*                                                                                                    |                                              |
| 23                                                                         | relapse                                                                                                      |                                              |
| 24                                                                         | admission                                                                                                    |                                              |
| 25                                                                         | hospitali?ation                                                                                              |                                              |
| 26                                                                         | crisis                                                                                                       |                                              |
| 27                                                                         | admitted                                                                                                     |                                              |
| 28                                                                         | detained                                                                                                     |                                              |
| 29                                                                         | detention                                                                                                    |                                              |
| 30                                                                         | recovery [Subject Headings]                                                                                  |                                              |
| 31                                                                         | “social functioning”                                                                                         |                                              |
| 32                                                                         | “self-rated recovery”                                                                                        |                                              |
| 33                                                                         | “quality of life”                                                                                            |                                              |
| 34                                                                         | “symptom severity”                                                                                           |                                              |
| 35                                                                         | disability                                                                                                   |                                              |
| 36                                                                         | #20 OR #21 OR #22 OR #23 OR #24 OR #25 OR #26 OR #27 OR #28 OR #29 OR #30 OR #31 OR #32 OR #33 OR #34 OR #35 | Outcomes                                     |
| 37                                                                         | onset                                                                                                        |                                              |
| 38                                                                         | first-episode                                                                                                |                                              |
| 39                                                                         | incidence [Subject Headings]                                                                                 |                                              |
| 40                                                                         | rate                                                                                                         |                                              |
| 41                                                                         | #37 OR #38 OR #39 OR #40                                                                                     | Onset                                        |
| 42                                                                         | #36 OR #41                                                                                                   | Outcomes/onset                               |
| 43                                                                         | #19 AND #42                                                                                                  | Loneliness, mental disorders, outcomes/onset |

## Cochrane Library

| Default search limits = title, abstract and keywords (except where otherwise stated) |                                                                                                              |                                              |
|--------------------------------------------------------------------------------------|--------------------------------------------------------------------------------------------------------------|----------------------------------------------|
| #                                                                                    | Search term                                                                                                  | Description                                  |
| 1                                                                                    | loneliness [MeSH]                                                                                            |                                              |
| 2                                                                                    | loneliness                                                                                                   |                                              |
| 3                                                                                    | lonely                                                                                                       |                                              |
| 4                                                                                    | “social support” near/5 (subjective or personal or perceived or quality))                                    |                                              |
| 5                                                                                    | “confiding relationship*”                                                                                    |                                              |
| 6                                                                                    | #1 OR #2 OR #3 OR #4 OR #5                                                                                   | Loneliness and related terms                 |
| 7                                                                                    | mental disorders [MeSH]. exp                                                                                 |                                              |
| 8                                                                                    | mental                                                                                                       |                                              |
| 9                                                                                    | psychiatr*                                                                                                   |                                              |
| 10                                                                                   | schizo*                                                                                                      |                                              |
| 11                                                                                   | psychosis                                                                                                    |                                              |
| 12                                                                                   | psychotic                                                                                                    |                                              |
| 13                                                                                   | depress*                                                                                                     |                                              |
| 14                                                                                   | mania*                                                                                                       |                                              |
| 15                                                                                   | manic                                                                                                        |                                              |
| 16                                                                                   | bipolar near/5 (disorder or disease or illness)                                                              |                                              |
| 17                                                                                   | anxiety disorders [MeSH]. exp                                                                                |                                              |
| 18                                                                                   | #7 OR #8 OR #9 OR #10 OR #11 OR #12 OR #13 OR #14 OR #15 OR #16 OR #17                                       | Mental disorders                             |
| 19                                                                                   | #6 AND #18                                                                                                   | Loneliness, mental disorders                 |
| 20                                                                                   | prognosis [MeSH]                                                                                             |                                              |
| 21                                                                                   | outcome*                                                                                                     |                                              |
| 22                                                                                   | recurren*                                                                                                    |                                              |
| 23                                                                                   | relapse                                                                                                      |                                              |
| 24                                                                                   | admission                                                                                                    |                                              |
| 25                                                                                   | hospitali?ation                                                                                              |                                              |
| 26                                                                                   | crisis                                                                                                       |                                              |
| 27                                                                                   | admitted                                                                                                     |                                              |
| 28                                                                                   | detained                                                                                                     |                                              |
| 29                                                                                   | detention                                                                                                    |                                              |
| 30                                                                                   | recovery of function [MeSH]                                                                                  |                                              |
| 31                                                                                   | “social functioning”                                                                                         |                                              |
| 32                                                                                   | “self-rated recovery”                                                                                        |                                              |
| 33                                                                                   | “quality of life”                                                                                            |                                              |
| 34                                                                                   | “symptom severity”                                                                                           |                                              |
| 35                                                                                   | disability                                                                                                   |                                              |
| 36                                                                                   | #20 OR #21 OR #22 OR #23 OR #24 OR #25 OR #26 OR #27 OR #28 OR #29 OR #30 OR #31 OR #32 OR #33 OR #34 OR #35 | Outcomes                                     |
| 37                                                                                   | onset                                                                                                        |                                              |
| 38                                                                                   | first-episode                                                                                                |                                              |
| 39                                                                                   | incidence [MeSH]                                                                                             |                                              |
| 40                                                                                   | rate                                                                                                         |                                              |
| 41                                                                                   | #37 OR #38 OR #39 OR #40                                                                                     | Onset                                        |
| 42                                                                                   | #36 OR #41                                                                                                   | Outcomes/onset                               |
| 43                                                                                   | #19 AND #42                                                                                                  | Loneliness, mental disorders, outcomes/onset |
